# Supplementary material for: Plio-Quaternary tectonic evolution of the southern margin of the Alboran Basin (Western Mediterranean)
Source: Copernicus journal article supplement (doi:10.5194/se-2019-122), 2019-07-26
Supplement: Supplementary file [file se-2019-122-AC2-supplement.pdf]

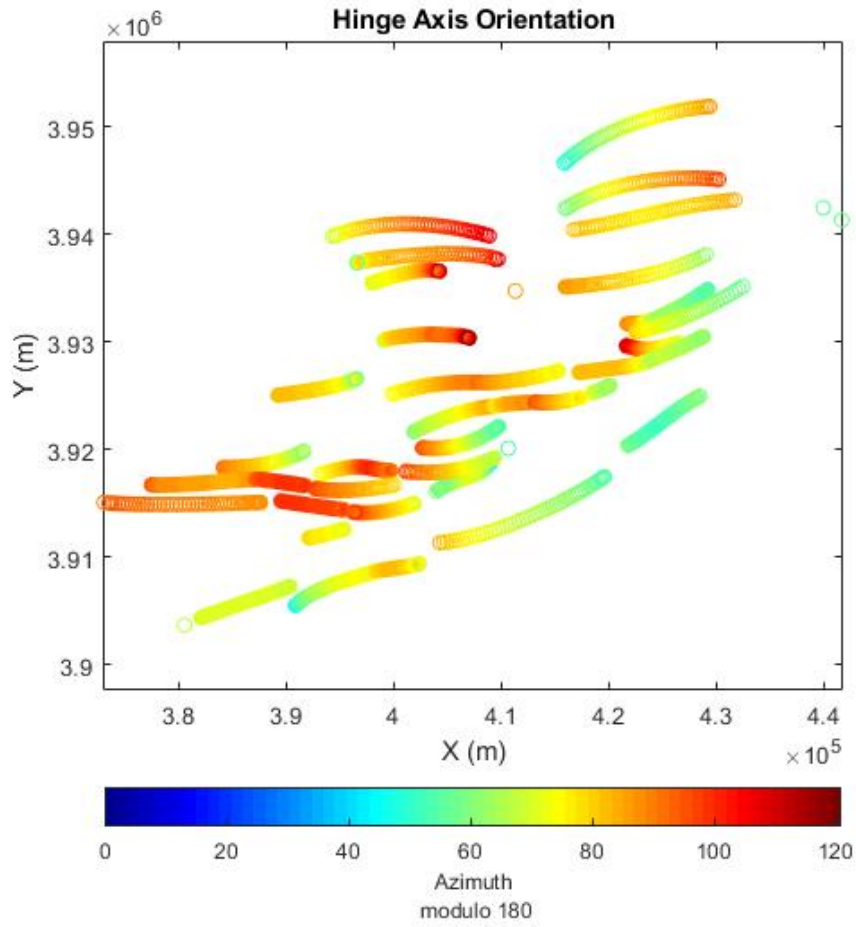

Figure 1: Azimuths of the hinge axis of the folds along the SAR area. Azimuths tend toward the E-W direction at the center of the folds and toward a N065 direction toward the tips of the folds, therefore demonstrating the left lateral deflection. Computations of the strike of the folds hinge axis are done using MatLab.
